# Supplementary material
Source: HighWire-hosted journal article supplement (https://bmjopen.bmj.com/content/9/7/e028357)
Supplement: inline-supplementary-material-1 [file inline-supplementary-material-1.pdf]

**Supplemental Table 1.** Dimensions of school tobacco policies and practice associated with smoking behaviour, crude analysis

|                                                                                            | <b>Campus<br/>N (%)</b> | <b>Current smoking<sup>a</sup><br/>OR (95% CI)</b> | <b><i>P</i></b> | <b>Daily cigarettes<br/>Mean (95% CI)<sup>b</sup></b> | <b><i>P</i></b> |
|--------------------------------------------------------------------------------------------|-------------------------|----------------------------------------------------|-----------------|-------------------------------------------------------|-----------------|
| <b>School tobacco policy</b>                                                               |                         |                                                    |                 |                                                       |                 |
| <i>National legislation</i>                                                                |                         |                                                    |                 |                                                       |                 |
| The school is covered by Danish law on smoke-free school grounds                           |                         |                                                    |                 |                                                       |                 |
| Yes                                                                                        | 17 (43)                 | 0.87 (0.77, 0.98)                                  | 0.025           | 15.4 (14.7, 16.0)                                     | 0.63            |
| No                                                                                         | 23 (58)                 | 1                                                  |                 | 15.6 (15.1, 16.0)                                     |                 |
| <i>Degree of formality</i>                                                                 |                         |                                                    |                 |                                                       |                 |
| The school has official approved a tobacco policy                                          |                         |                                                    |                 |                                                       |                 |
| Yes                                                                                        | 37 (97)                 | -                                                  |                 | -                                                     |                 |
| No                                                                                         | 0 (0)                   | -                                                  |                 | -                                                     |                 |
| Missing                                                                                    | 1 (3)                   | -                                                  |                 | -                                                     |                 |
| <i>Comprehensiveness</i>                                                                   |                         |                                                    |                 |                                                       |                 |
| Teachers are allowed to smoke with students                                                |                         |                                                    |                 |                                                       |                 |
| Yes                                                                                        | 21 (55)                 | 1.14 (1.02, 1.28)                                  | 0.025           | 16.0 (15.5, 16.5)                                     | 0.022           |
| No                                                                                         | 17 (45)                 | 1                                                  |                 | 15.1 (14.6, 15.7)                                     |                 |
| Students are allowed to take smoke breaks during (some) classes                            |                         |                                                    |                 |                                                       |                 |
| Yes                                                                                        | 23 (61)                 | 0.97 (0.87, 1.09)                                  | 0.65            | 16.1 (15.6, 16.6)                                     | 0.001           |
| No                                                                                         | 15 (39)                 | 1                                                  |                 | 14.8 (14.3, 15.4)                                     |                 |
| Sale of cigarettes on campus                                                               |                         |                                                    |                 |                                                       |                 |
| Yes                                                                                        | 7 (19)                  | 1.04 (0.90, 1.20)                                  | 0.64            | 16.8 (15.9, 17.7)                                     | 0.003           |
| No                                                                                         | 30 (81)                 | 1                                                  |                 | 15.3 (14.9, 15.7)                                     |                 |
| <i>Smoking cessation service</i>                                                           |                         |                                                    |                 |                                                       |                 |
| The school has smoking cessation support to the students                                   |                         |                                                    |                 |                                                       |                 |
| Yes, always or in periods                                                                  | 13 (34)                 | 1.03 (0.91, 1.17)                                  | 0.60            | 15.8 (15.3, 16.3)                                     | 0.21            |
| No                                                                                         | 25 (66)                 | 1                                                  |                 | 15.2 (14.6, 15.9)                                     |                 |
| Regular procedure to inform students about existing smoking cessation service <sup>c</sup> |                         |                                                    |                 |                                                       |                 |
| Yes                                                                                        | 6 (46)                  | 0.83 (0.67, 1.02)                                  | 0.08            | 13.6 (12.6, 14.7)                                     | 0.004           |
| No                                                                                         | 7 (54)                  | 1                                                  |                 | 16.3 (15.3, 17.3)                                     |                 |
| <i>Consequences</i>                                                                        |                         |                                                    |                 |                                                       |                 |
| The school have implemented consequences for breaking smoking rules                        |                         |                                                    |                 |                                                       |                 |
| Yes                                                                                        | 33 (87)                 | 0.90 (0.77, 1.05)                                  | 0.19            | 14.8 (14.1, 15.5)                                     | 0.003           |
| No                                                                                         | 5 (13)                  | 1                                                  |                 | 16.2 (15.1, 17.4)                                     |                 |
| <i>Communication</i>                                                                       |                         |                                                    |                 |                                                       |                 |
| "No Smoking" signs                                                                         |                         |                                                    |                 |                                                       |                 |
| Yes                                                                                        | 32 (89)                 | 0.79 (0.64, 0.98)                                  | 0.029           | 15.3 (14.9, 15.7)                                     | 0.012           |
| No                                                                                         | 4 (11)                  | 1                                                  |                 | 16.5 (15.6, 17.4)                                     |                 |
| <b>School tobacco practice</b>                                                             |                         |                                                    |                 |                                                       |                 |
| Visibility of student smoking                                                              |                         |                                                    |                 |                                                       |                 |
| Yes, on the entire school ground                                                           | 22 (61)                 | 1.22 (1.05, 1.40)                                  | 0.002           | 15.5 (15.0, 16.0)                                     | 0.78            |
| Yes, in restricted smoking areas                                                           | 6 (17)                  | 0.98 (0.81, 1.17)                                  |                 | 15.4 (14.5, 16.3)                                     |                 |
| No                                                                                         | 8 (22)                  | 1                                                  |                 | 15.8 (15.0, 16.7)                                     |                 |

<sup>a</sup> Logistic regression analysis, with not current smoking as reference category. Number of students = 5,013

<sup>b</sup> Negative binomial regression analysis, only daily smokers included. Number of students = 1,908

<sup>c</sup> Among students who were enrolled in schools that offered smoking cessation services
