# Supplementary material
Source: HighWire-hosted journal article supplement (https://bmjopen.bmj.com/content/9/7/e028357)
Supplement: inline-supplementary-material-2 [file inline-supplementary-material-2.pdf]

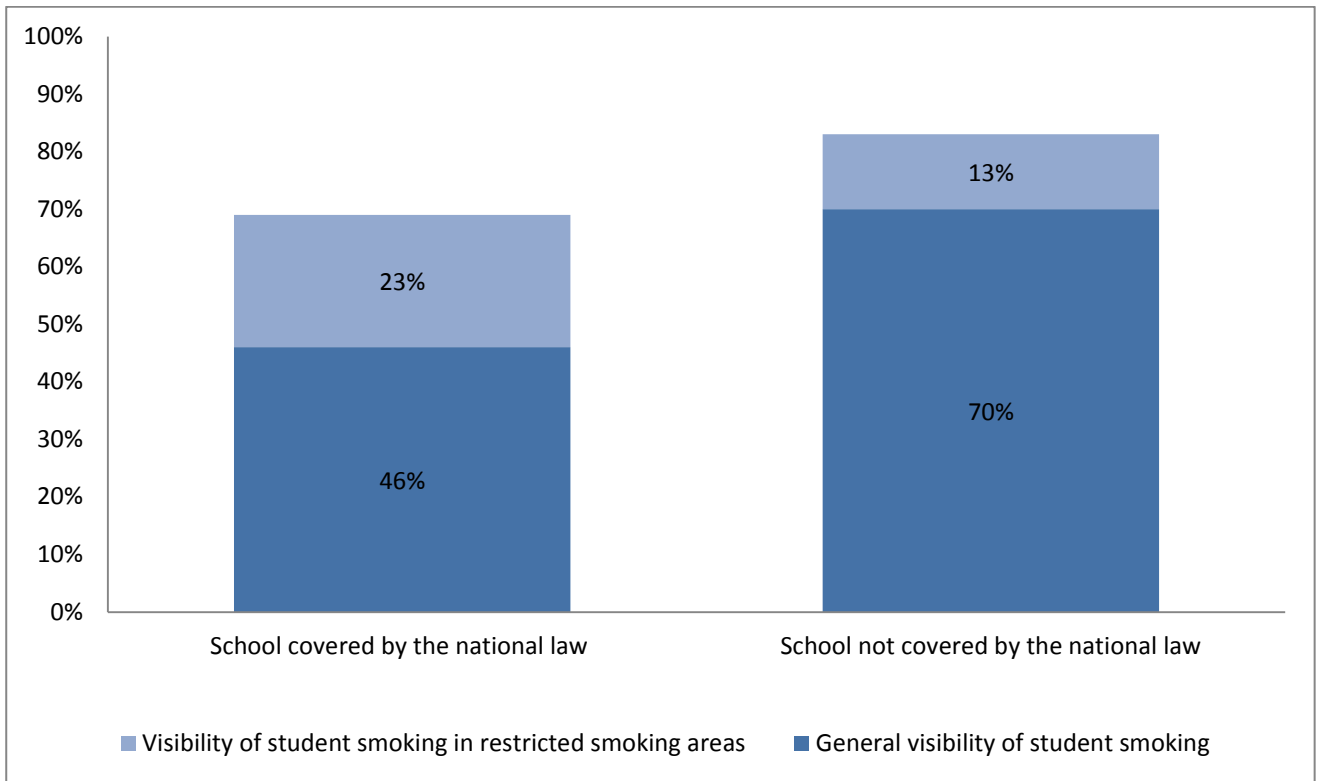

**Supplemental Figure 1.** Visibility of student smoking by vocational schools covered by the Danish national law on smoke-free school grounds.
